# Supplementary material for: Proof of principle of a three-input AND–INHIBIT–OR combinatorial logic gate array
Source: Royal Society of Chemistry journal article supplement (doi:10.1039/c7ob01223c), 2017-01-01
Supplement: c7ob01223c1.pdf [file c7ob01223c1.pdf]

# Supporting Information

## *Organic & Biomolecular Chemistry*

### **Proof of Principle of a Three-Input AND-INHIBIT-OR Combinatorial Logic Gate Array**

David C. Magri\* and Jake C. Spiteri

Department of Chemistry

Faculty of Science

University of Malta

Msida, Malta, MSD 2080

email: david.magri@um.edu.mt

Phone: (+356) 2340 2276

## Experimental

### Instrumentation

$^1\text{H}$  and  $^{13}\text{C}$  NMR spectra were recorded on a Bruker Avance III HD NMR spectrometer equipped with an Ascend 500 11.75 Tesla Superconducting Magnet, operating at a frequency of 500.13 MHz for  $^1\text{H}$  NMR and 125.76 MHz for  $^{13}\text{C}$  NMR and with a multinuclear 5 mm PABBO Probe. Data were acquired and processed via Topspin Software, ver. 3.2. Chemical shifts for  $^1\text{H}$  NMR were recorded in ppm downfield from TMS set at  $\delta = 0.00$  ppm and  $^{13}\text{C}$  NMR spectra were referenced to the solvent triplet signal of  $\text{CDCl}_3$  at  $\delta = 77.00$  ppm. Infra-red spectra were recorded on a Shimadzu IR-affinity 1 FT-IR spectrometer calibrated against polystyrene at  $1602\text{ cm}^{-1}$  as KBr disks. Electrospray time-of-flight (ES-TOF) spectra were performed on a Waters LC Premier instrument.

UV-visible absorption spectra were recorded on a Jasco V-650 spectrophotometer connected to a desktop computer. The instrumentation parameters were set to medium response, bandwidth of 2 nm and scan speed of  $200\text{ nm min}^{-1}$ . Samples were scanned over the range of 350-600 nm. All spectra were background corrected for the solvent by scanning the appropriate blank solvent prior to beginning the experiments. Fluorimetric studies were conducted using a Jasco FP-8300 spectrophotometer with a 10 mm path length quartz cuvette. The excitation and emission slits were set at 2.5 and 5.0 nm, respectively. The emission range was 400-650 nm, unless otherwise stated.

### Synthesis: *N*-ferrocenylmethyl-4-(piperazine-4'-benzo-15-crown-5)-1,8-naphthalimide **1**

4'-Formylbenzo-15-crown-5 (0.215 g, 0.730 mmol), **3** (0.118 g, 0.250 mmol), sodium triacetoxyborohydride (0.237 g, 1.12 mmol) and glacial acetic acid (0.053 g/ 50  $\mu\text{L}$ , 0.88 mmol) were mixed in 20 mL of 1,2-dichloroethane (DCE).<sup>1</sup> The reaction was carried out at room temperature for 5 days in the presence of 4 Å molecular sieves. The reaction mixture was filtered and then washed with copious amount of water to remove  $\text{Na}^+$  cations from the crown ether. The product was extracted with dichloromethane and dried using activated molecular sieves size 4 Å. Excess solvent was removed by rotary evaporator and the desired product was purified via recrystallisation using 1:1 (v/v)

acetone/ethanol. A yellow solid was collected in 12% yield.  $R_f = 0.61$  (8:1 (v/v)  $\text{CH}_2\text{Cl}_2/\text{MeOH}$ ); m.p. = 137-141 °C;  $^1\text{H}$  NMR ( $\text{CDCl}_3$ , ppm):  $\delta$  8.55 (dd, 1H,  $J = 7.4, 1.1$  Hz, Ar-*H*), 8.48 (d, 1H,  $J = 8.1$  Hz, Ar-*H*), 8.37 (dd, 1H,  $J = 8.5, 1.1$  Hz, Ar-*H*), 7.64 (dd, 1H,  $J = 7.9, 1.1$  Hz, Ar-*H*), 7.17 (d, 1H,  $J = 8.1$  Hz, Ar-*H*), 6.93 (d, 1H,  $J = 1.7$  Hz, Ar(benzo)-*H*), 6.86 (dd, 1H,  $J = 8.1, 1.7$  Hz, Ar(benzo)-*H*), 6.83 (d, 1H,  $J = 8.1$  Hz, Ar(benzo)-*H*), 5.11 (s, 2H,  $-\text{NCH}_2\text{Cp}$ ), 4.49 (t, 2H,  $J = 1.8$  Hz, Cp), 4.20 (m, 5H, Cp), 4.17 (m, 2H, crown *Hs*), 4.14 (m, 2H, crown *Hs*), 4.06 (t, 2H,  $J = 1.8$  Hz, Cp), 3.92 (m, 4H, crown *Hs*), 3.76 (m, 8H, crown *Hs*), 3.56 (s, 2H, Ar(benzo)- $\text{CH}_2\text{N}$ ), 3.26 (m, 4H,  $-\text{N}(\text{CH}_2\text{CH}_2)_2\text{NCH}_2$ ), 2.73 (m, 4H,  $-\text{N}(\text{CH}_2\text{CH}_2)_2\text{NCH}_2$ );  $^{13}\text{C}$  NMR ( $\text{CDCl}_3$ , ppm):  $\delta$  164.3, 163.8, 156.1, 149.2, 148.4, 132.6, 131.0, 130.9, 130.3, 129.9, 126.1, 125.5, 123.2, 122.0, 116.7, 114.9, 114.8, 113.7, 83.4, 71.1, 70.6, 70.4, 69.7, 69.2, 69.1, 68.6, 68.0, 62.7, 53.1, 53.0, 39.1; IR (KBr,  $\text{cm}^{-1}$ ): 3450, 3089, 2926, 2870, 2814, 1692, 1684, 1656, 1647, 1590, 1506, 1456, 1385, 1372, 1334, 1243, 1136, 1103, 938, 785; HRMS (ES-ToF): Calculated  $\text{C}_{42}\text{H}_{45}\text{N}_3\text{O}_7\text{NaFe}$   $[\text{M}+\text{Na}]^+$  782.2505, found 782.2538.

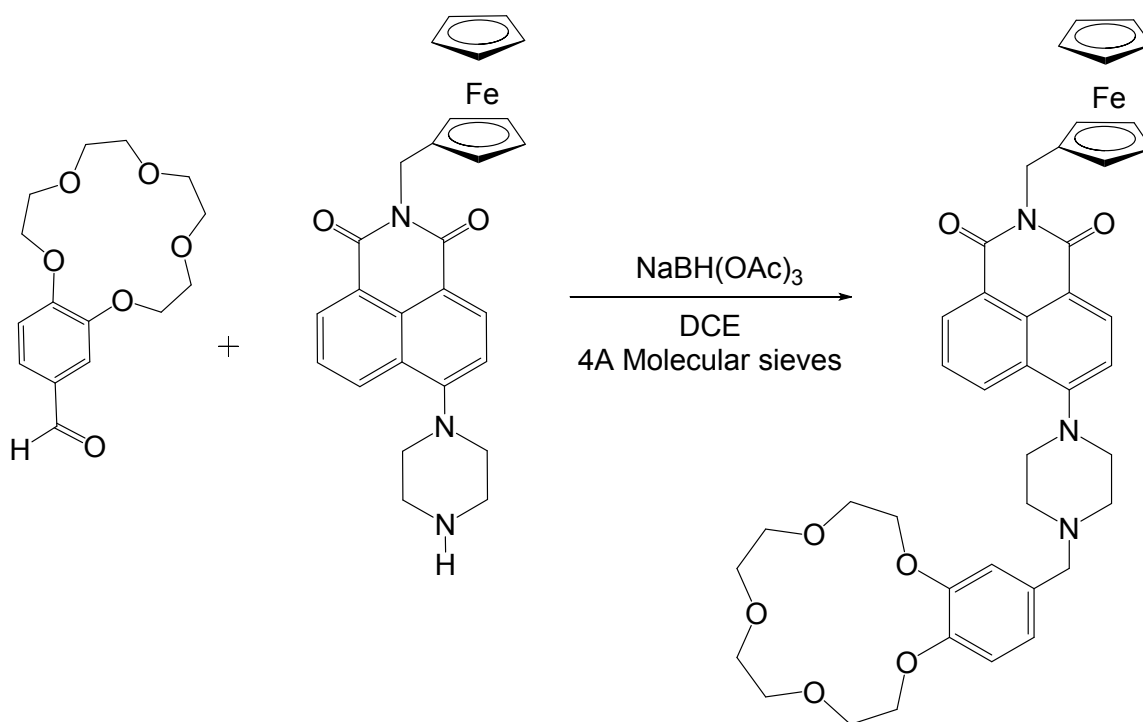

**Scheme S1:** The synthesis of molecule **1** by reductive animation.

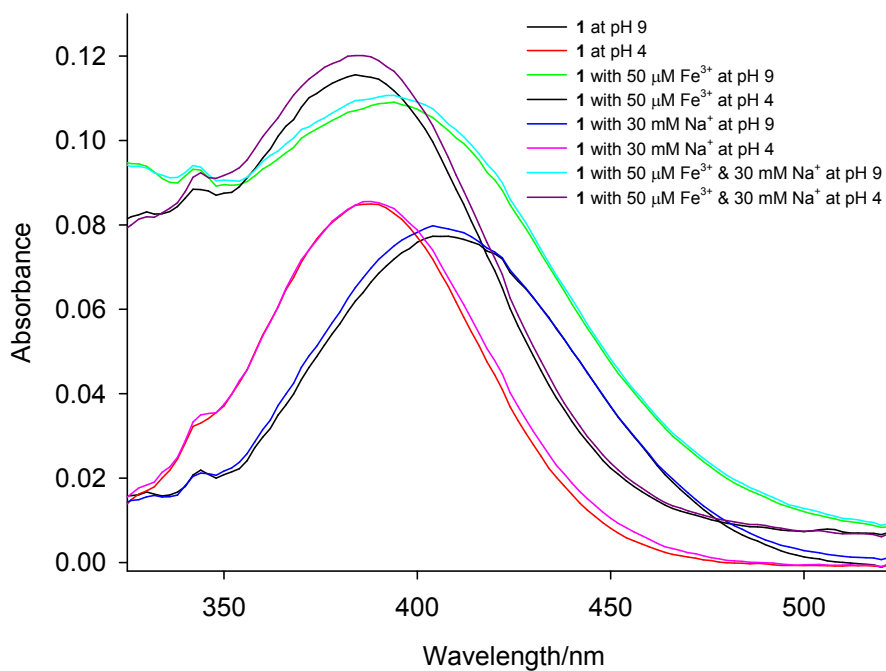

**Fig. S1:** UV-visible absorption spectra of 6 μM **1** in 1:1 (v/v) MeOH/H<sub>2</sub>O for the eight inputs combinations H<sup>+</sup>, Fe<sup>3+</sup> and Na<sup>+</sup>.

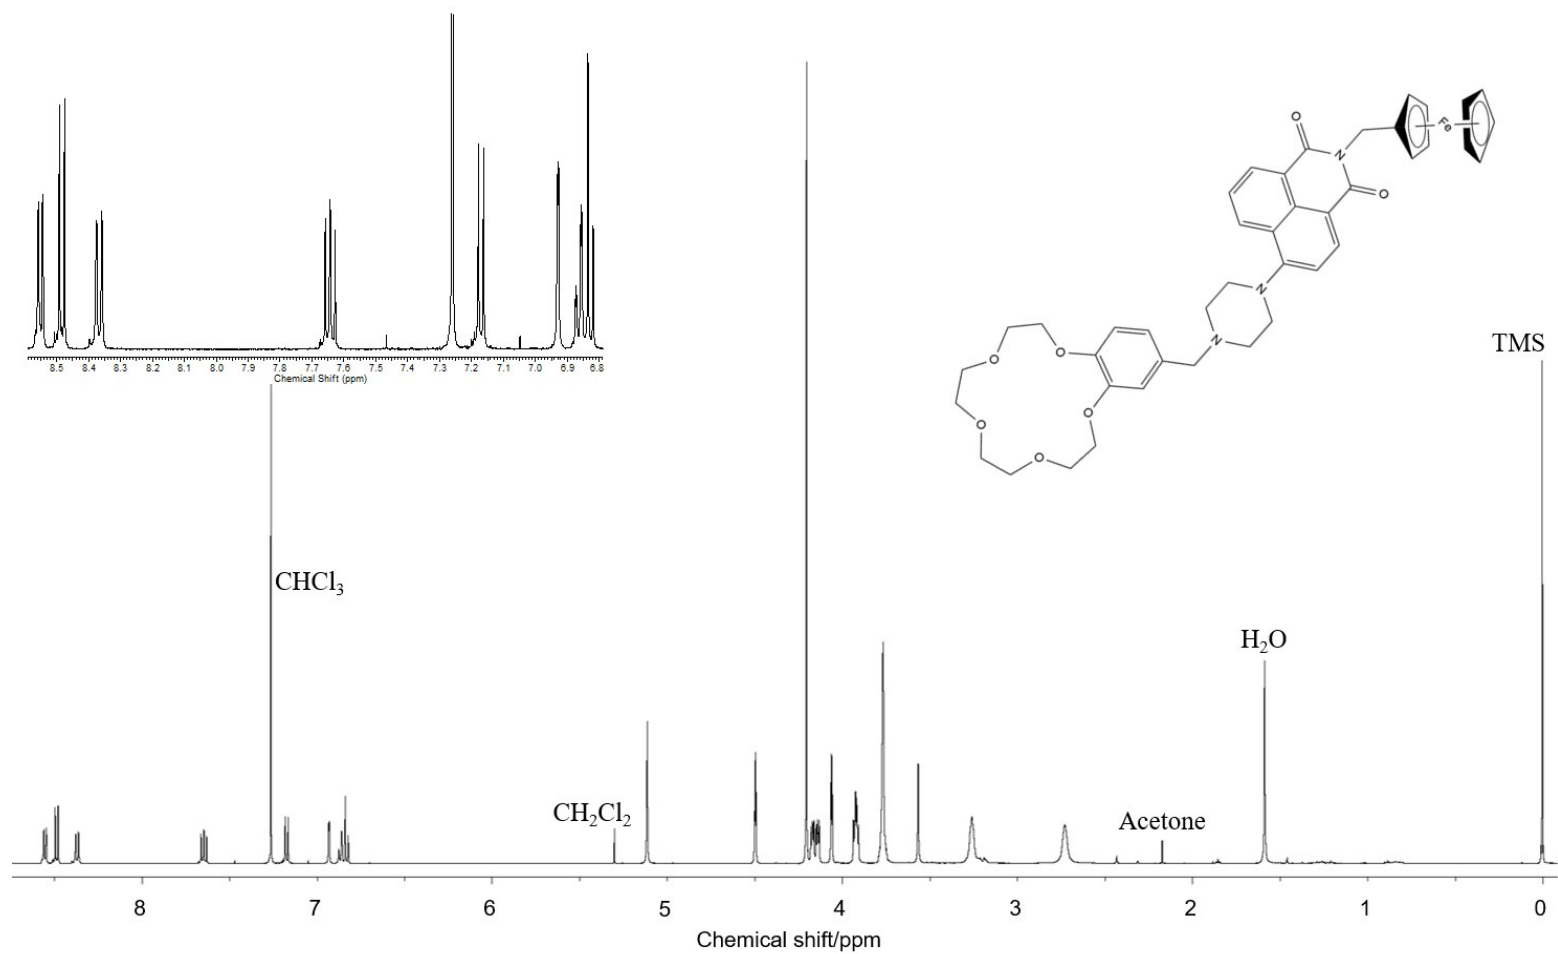

**Fig. S2:**  $^1\text{H}$  NMR spectrum of **1** in  $\text{CDCl}_3$  at 500 MHz.

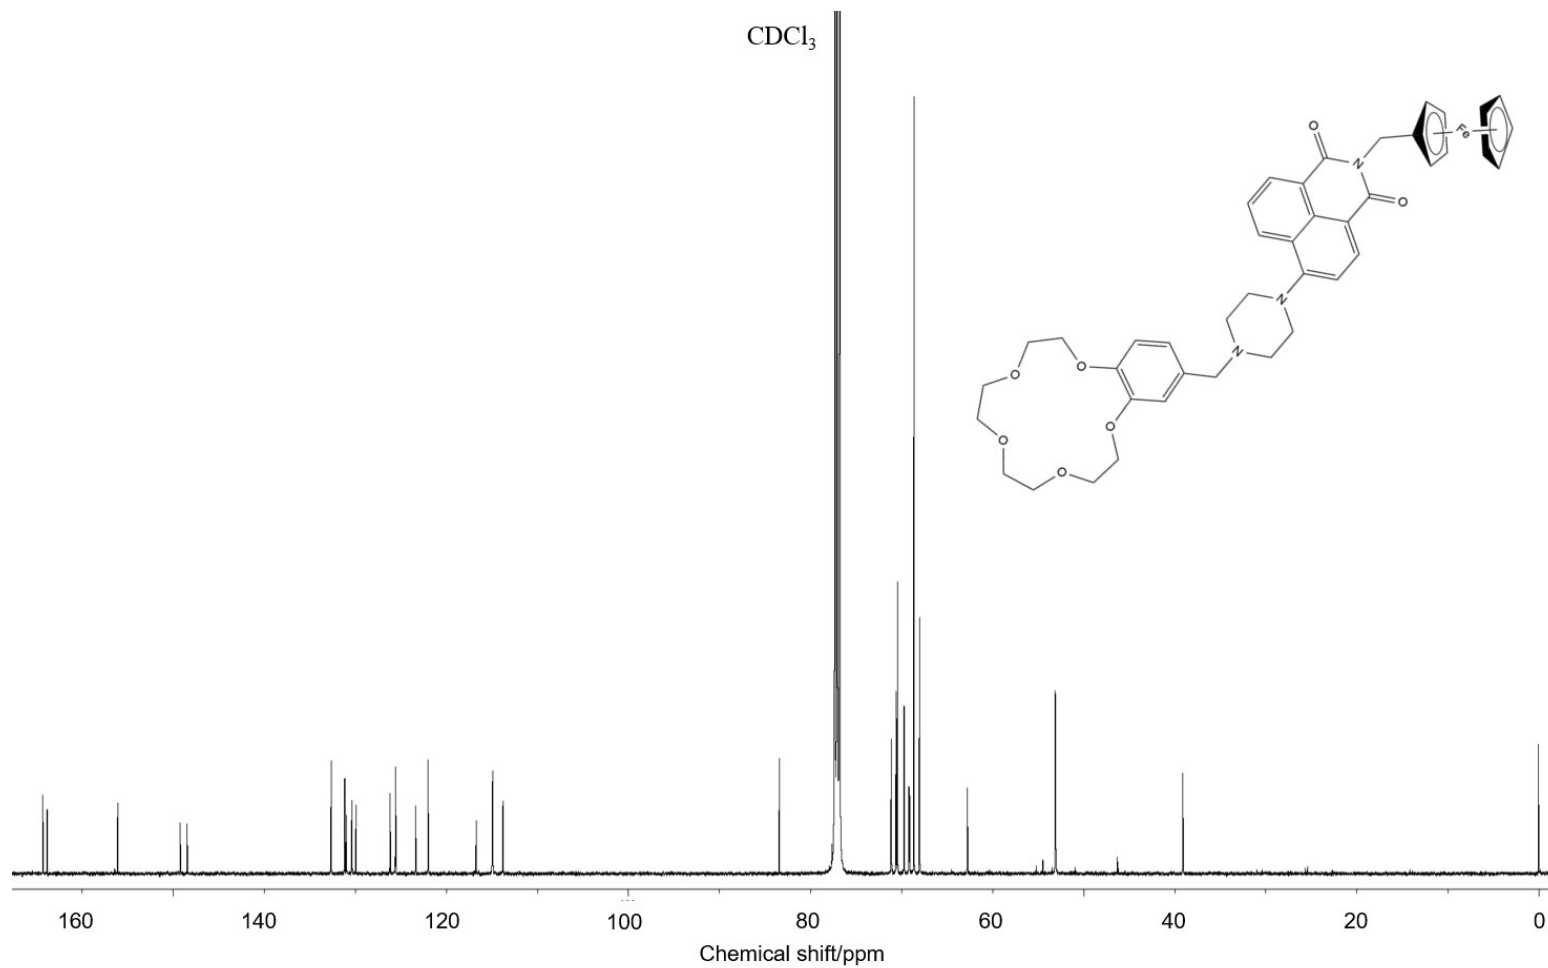

**Fig. S3:**  $^{13}\text{C}$  NMR spectrum of **1** in  $\text{CDCl}_3$  at 125 MHz.

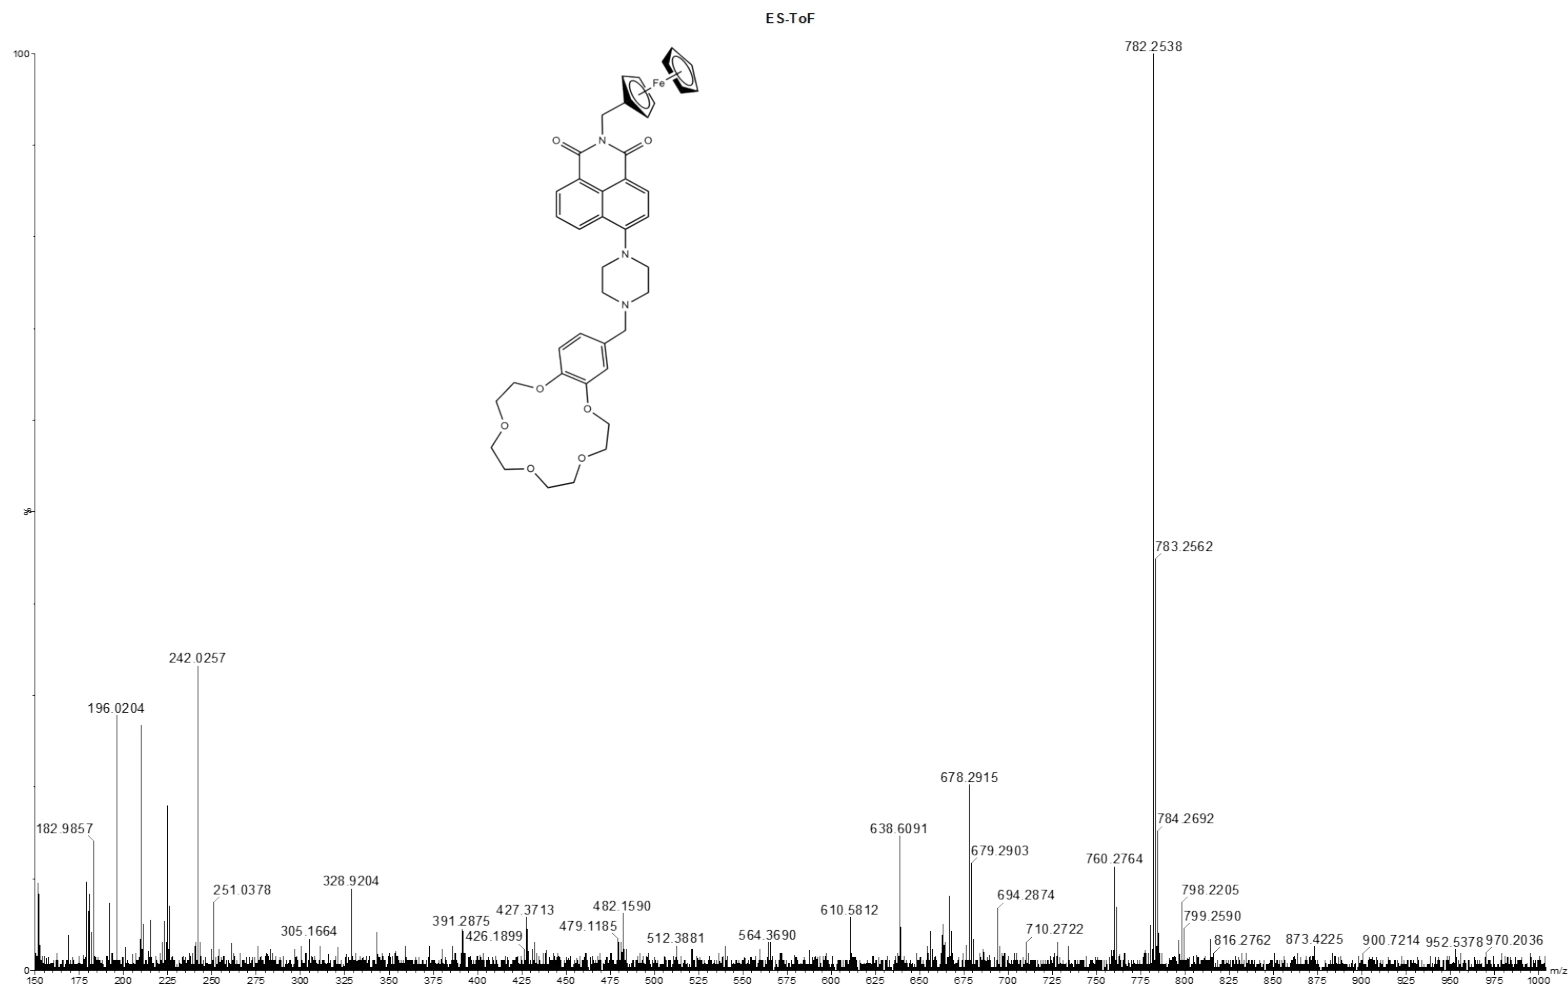

**Fig. S4:** High resolution MS of **1** by electrospray time-of-flight mass technique.

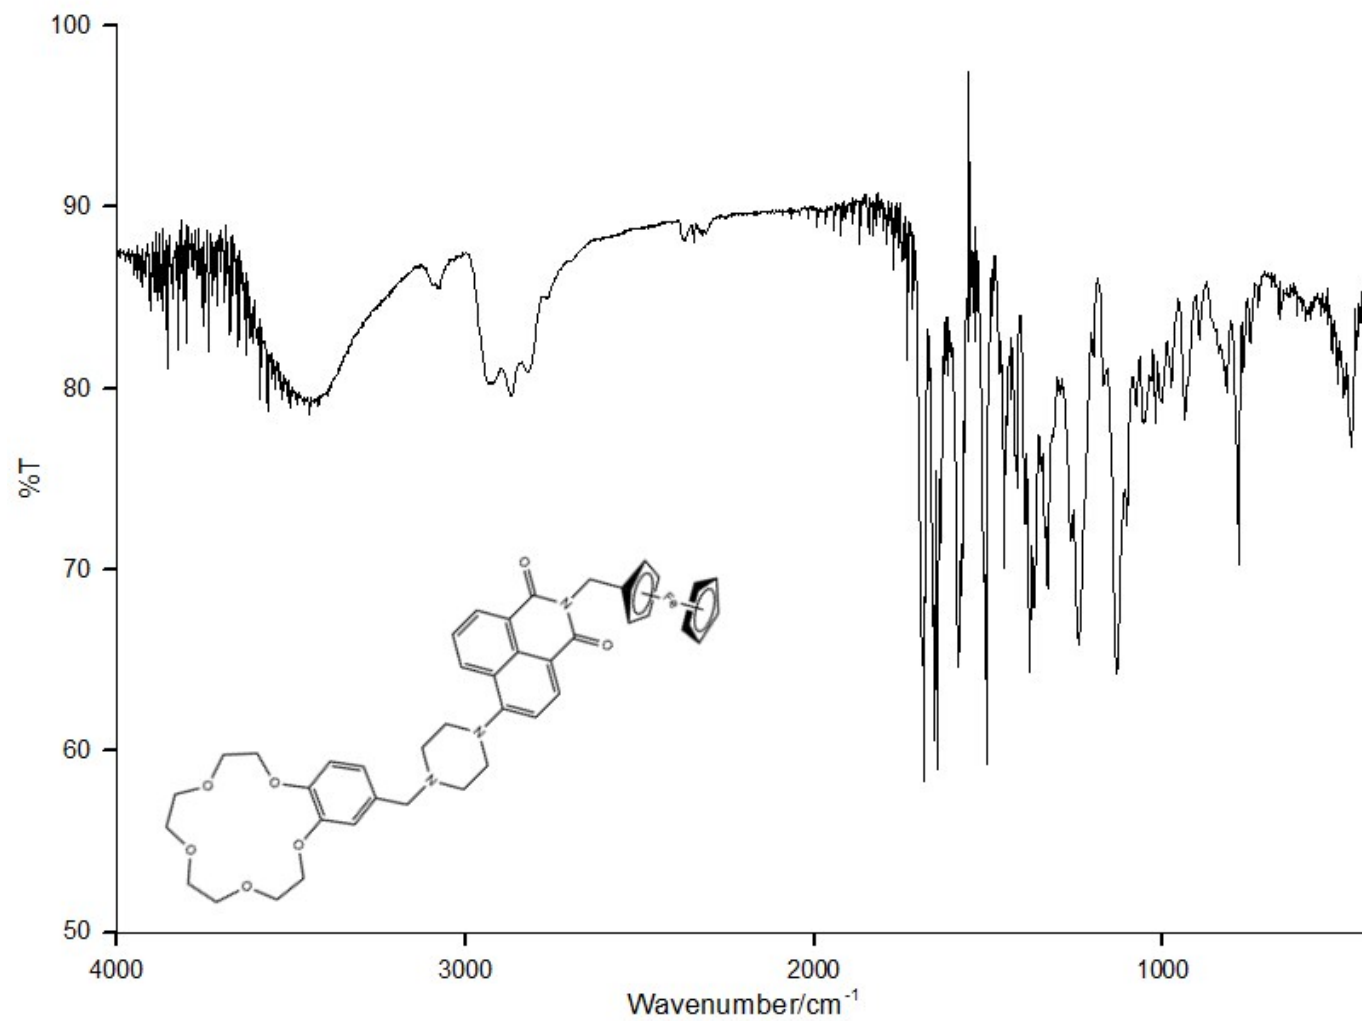

**Fig. S5:** IR spectrum of **1** (KBr disk).
